# Supplementary material for: Group VI metal aminoborylene complex-catalyzed demercuration reactions of bis(alkynyl)mercurials
Source: Royal Society of Chemistry journal article supplement (doi:10.1039/b715597b), 2007-11-15
Supplement: b715597b.pdf [file b715597b.pdf]

## Group VI Metal Aminoborylene Complex-Catalyzed Demercuration Reactions of bis(Alkynyl)mercurials

Leonardo Apostolico,<sup>a</sup> Holger Braunschweig,<sup>a\*</sup> Andrew G. Crawford,<sup>b</sup> Thomas Herbst,<sup>a</sup>  
Daniela Rais<sup>a</sup>

### Electronic Supporting Information

1) Irradiation of  $[(\text{CO})_5\text{Cr}=\text{BN}(\text{SiMe}_3)_2]$  (**1**) with  $[\text{Hg}(\text{C}\equiv\text{CPh})_2]$  (**4a**) in  $\text{C}_6\text{D}_6$  yielded a new boron-containing compound **5** as indicated e.g. by a  $^{11}\text{B}\{^1\text{H}\}$ -NMR signal at 25.0 ppm, a resonance for the  $\text{SiMe}_3$ -groups at 0.35 ppm in the  $^1\text{H}$ -NMR spectrum (of the reaction mixture) and a EI-MS peak at  $m/z = 544$  ( $\text{M}^+$ ) (after GC-MS). As to verify the assumed bisborirene constitution of compound **5**, this species was prepared independently according to the known synthesis<sup>1</sup> of bisborirenes:

A pale yellow solution of 100 mg (0.25 mmol) **1** with 25.0 mg (0.13 mmol) 1,4-diphenylbuta-1,3-diyne in 1.5 ml benzene was irradiated for 6h at room temperature. The volatile components were removed under vacuum, and the brown residue was treated with 5 ml of hexane. The hexane solution was stored at  $-60^\circ\text{C}$  over night. Precipitated  $[\text{Cr}(\text{CO})_6]$  was removed and the solution was filtered over glass-fibre filter paper. The bisborirene **5** was isolated as a yellow solid in 80% yield (108mg).  $^1\text{H}$ -NMR (500MHz,  $\text{C}_6\text{D}_6$ ):  $\delta = 7.84\text{-}7.83$  (m, 4H, Ph),  $7.20\text{-}6.88$  (m, 6H, Ph),  $0.35$  (s, 36H,  $\text{SiMe}_3$ );  $^{13}\text{C}\{^1\text{H}\}$ -NMR (125 MHz,  $\text{C}_6\text{D}_6$ ):  $\delta = 163.3$  (bs, Ph-C=),  $149.3$  (bs, =C-C=),  $132.8$  (s, Ph),  $130.4$  (s, Ph),  $129.1$  (s, Ph),  $128.6$  (s, Ph),  $3.2$  (s, N-SiMe<sub>3</sub>);  $^{11}\text{B}\{^1\text{H}\}$ -NMR (160 MHz,  $\text{C}_6\text{D}_6$ ):  $\delta = 24.0$  (s). EI-MS  $m/z = 544$  ( $\text{M}^+$ ).

### 2) Performance of catalytic experiments:

In a typical catalytic experiment solid **1** (0.0024 g, 0.0066 mmol) was added to a solution of  $[\text{Hg}(\text{C}\equiv\text{C}-\text{C}_6\text{H}_4\text{-}p\text{-Me})_2]$  (0.066 mmol) in benzene (1.5 mL) and heated to  $90^\circ\text{C}$ . The progress of the reaction was monitored by observation of the characteristic signals of the *para*-Me groups in the  $^1\text{H}$  NMR spectra. At time = 0h, only the singlet for  $[\text{Hg}(\text{C}\equiv\text{C}-\text{C}_6\text{H}_4\text{-}p\text{-Me})_2]$  at  $\delta = 2.02$  was observed. This resonance gradually disappeared after some hours, with appearance of a singlet at  $\delta = 1.91$  indicating the formation of the known diyne **7b**.<sup>2</sup> After 70h the starting material was fully consumed and only the signal at  $\delta = 1.91$  was detectable. The  $^1\text{H}$  NMR spectra revealed no significant amount of any degradation product.

Crystalline **7b** (66% yield) was obtained upon extraction from the residue with hexane, filtration and storage of the filtrate at  $-60^\circ\text{C}$  in. The  $^1\text{H}$ -NMR (200MHz,  $\text{C}_6\text{D}_6$ ) data were found to be identical to those reported earlier for this compound.<sup>2</sup>

References:

- 1) H. Braunschweig, T. Herbst, D. Rais, F. Seeler, *Angew. Chem.* 2005, **117**, 7627-7629;  
*Angew. Chem. Int. Ed.* 2005, 44, 7461-7463.
- 2) S. V. Damle, D. Seomoon, P. H. Lee, *J. Org. Chem.* 2003, **68**, 7085-7087.
